# Supplementary material for: Improving measures of work-related physical functioning
Source: Springer Nature journal article supplement (doi:10.1007/s11136-016-1477-1), 2016-12-22
Supplement: MOESM1 [file 11952994]

**Appendix A. Item Parameters**

Notes:

Slope = item discrimination parameter

B1,…,B4 = item threshold parameters. The number of threshold parameters equal to number of categories minus 1. For the Community Mobility Driving scale, because of the skewed distribution of the sample distribution across response categories, we merged the first with the second and fourth with the fifth categories. Therefore the number of categories was decreased from 5 to 3, and the number of threshold parameters was decreased from 4 to 2.

DIF: For example, item 29 in basic mobility was indicated as gender DIF item. We will use 29.a item parameters for male subjects and 29.b item parameters for female subjects.

**Basic Mobility**

| Item | SLOPE | B1 | B2 | B3 | B4 | DIF |
| --- | --- | --- | --- | --- | --- | --- |
| 1 | 2.69839 | -3.00297 | -2.03314 | -1.19328 | -0.61392 |  |
| 2 | 2.07909 | -1.42781 | -0.79169 | -0.049 | 0.65299 |  |
| 3 | 2.21365 | -2.18301 | -1.57384 | -0.68832 | 0.04545 |  |
| 4 | 2.15493 | -1.17014 | -0.73944 | 0.03101 | 0.59952 |  |
| 5 | 2.83069 | -2.40643 | -2.03305 | -1.19678 | -0.50432 |  |
| 6 | 2.18294 | -1.58873 | -1.12415 | -0.36146 | 0.43503 |  |
| 7 | 2.45354 | -2.18765 | -1.76049 | -0.97799 | -0.36308 |  |
| 8 | 3.21552 | -2.09218 | -1.6786 | -0.96784 | -0.35111 |  |
| 9 | 3.14384 | -2.88461 | -2.06843 | -1.2396 | -0.56428 |  |
| 10 | 3.00161 | -2.29532 | -1.80792 | -1.05407 | -0.41944 |  |
| 11 | 2.54771 | -2.16396 | -1.32446 | -0.48185 | 0.22171 |  |
| 12 | 2.29622 | -2.67268 | -1.81314 | -0.9496 | -0.24614 |  |
| 13 | 2.78885 | -2.251 | -1.78347 | -0.99322 | -0.36303 |  |
| 14 | 3.53963 | -2.42193 | -1.64425 | -0.84366 | -0.21233 |  |
| 15 | 2.58498 | -1.85718 | -1.43893 | -0.73261 | -0.04082 |  |
| 16 | 2.9422 | -1.98268 | -1.72715 | -1.06136 | -0.31741 |  |
| 17 | 1.61652 | -2.37274 | -1.17566 | -0.05998 | 0.77565 |  |
| 18 | 2.17787 | -2.26651 | -1.653 | -0.82386 | -0.04333 |  |
| 19 | 2.10116 | -2.12273 | -1.65058 | -0.84678 | -0.12832 |  |
| 20 | 2.50785 | -2.43802 | -1.62465 | -0.82788 | -0.11469 |  |
| 21 | 3.53013 | -2.58328 | -1.81369 | -0.98891 | -0.35002 |  |
| 22 | 2.43416 | -1.3257 | -0.77658 | -0.03347 | 0.62329 |  |
| 23 | 1.76543 | -1.5118 | -0.68871 | 0.14829 | 0.91753 |  |
| 24 | 3.87464 | -2.20525 | -1.69476 | -0.94637 | -0.31936 |  |
| 25 | 3.09107 | -2.11934 | -1.87885 | -1.1966 | -0.54712 |  |
| 26 | 2.68848 | -2.52118 | -1.93365 | -1.02775 | -0.26809 |  |
| 27 | 3.03729 | -1.83151 | -1.42702 | -0.82515 | -0.25644 |  |
| 28 | 3.00097 | -1.93477 | -1.27446 | -0.5585 | 0.14326 |  |
| 29.a | 1.78484 | -1.91641 | -1.21665 | -0.27865 | 0.59254 | male |
| 29.b | 1.58167 | -1.90307 | -0.99246 | 0.03467 | 0.839 | female |
| 30 | 2.07069 | -2.50323 | -1.76225 | -0.82988 | -0.00504 |  |
| 31 | 2.36114 | -1.94777 | -1.31894 | -0.63895 | 0.03634 |  |
| 32.a | 2.6053 | -1.7017 | -1.16406 | -0.48366 | 0.24725 | male |
| 32.b | 2.03731 | -1.33538 | -0.78054 | -0.00861 | 0.68254 | female |
| 33 | 2.93551 | -2.72081 | -1.99145 | -1.2203 | -0.54272 |  |
| 34 | 3.16454 | -2.39522 | -1.75207 | -1.02041 | -0.3818 |  |
| 35 | 2.44649 | -2.94052 | -2.04048 | -1.14579 | -0.40858 |  |
| 36 | 3.14193 | -2.40369 | -1.7196 | -0.91755 | -0.25258 |  |
| 37 | 3.74431 | -2.26427 | -1.71115 | -1.02962 | -0.43129 |  |
| 38 | 2.81963 | -2.22481 | -1.42326 | -0.66462 | 0.02829 |  |
| 39.a | 2.53111 | -2.36985 | -1.59276 | -0.66698 | 0.10438 | male |
| 39.b | 2.0748 | -1.92704 | -0.97082 | -0.00372 | 0.81386 | female |
| 40 | 1.99048 | -2.84283 | -1.94219 | -0.90534 | -0.11753 |  |
| 41 | 3.62219 | -2.46485 | -1.96277 | -1.18914 | -0.50544 |  |
| 42 | 3.21136 | -2.73874 | -2.14831 | -1.42679 | -0.7327 |  |
| 43 | 3.21377 | -2.38061 | -1.67807 | -0.87804 | -0.20335 |  |
| 44 | 3.16069 | -2.21285 | -1.45482 | -0.70317 | -0.04068 |  |
| 45.a | 2.88185 | -2.13365 | -1.50994 | -0.83484 | -0.07254 | male |
| 45.b | 2.1394 | -1.82457 | -1.12557 | -0.35524 | 0.34974 | female |

**Upper Body Function**

| Item | SLOPE | B1 | B2 | B3 | B4 | DIF |
| --- | --- | --- | --- | --- | --- | --- |
| 1 | 2.30362 | -0.96759 | -0.08485 | 0.84003 | 1.61716 |  |
| 2 | 1.99523 | -1.29983 | -0.4545 | 0.45632 | 1.23827 |  |
| 3 | 2.42742 | -1.03238 | -0.50877 | 0.24058 | 0.88908 |  |
| 4 | 3.02645 | 0.62167 | 1.14517 | 1.66805 | 2.21399 |  |
| 5 | 3.23787 | -0.82883 | -0.37767 | 0.28466 | 0.88402 |  |
| 6 | 2.88737 | 0.1673 | 0.87294 | 1.51428 | 2.13348 |  |
| 7 | 2.84091 | -0.89254 | -0.30564 | 0.35647 | 0.96903 |  |
| 8 | 2.68337 | -0.00307 | 0.53353 | 1.08526 | 1.56422 |  |
| 9 | 2.08301 | -0.7841 | -0.21812 | 0.53603 | 1.13279 |  |
| 10 | 2.51894 | 0.08606 | 0.84756 | 1.53176 | 2.21784 |  |
| 11 | 2.68031 | -0.8464 | -0.3578 | 0.34963 | 0.97025 |  |
| 12 | 3.57733 | -0.27615 | 0.2446 | 0.86274 | 1.49964 |  |
| 13 | 3.44454 | -0.65559 | -0.1079 | 0.57411 | 1.20374 |  |
| 14 | 2.61166 | -0.58043 | -0.19995 | 0.39544 | 0.99458 |  |
| 15 | 2.40955 | 0.23264 | 1.0335 | 1.7314 | 2.36776 |  |
| 16 | 3.30835 | -0.05802 | 0.3931 | 0.95297 | 1.55754 |  |
| 17 | 3.00948 | 0.15326 | 0.8179 | 1.42089 | 1.96462 |  |
| 18 | 3.0347 | 0.43194 | 1.08622 | 1.66981 | 2.14975 |  |
| 19 | 3.36489 | 0.35114 | 0.86566 | 1.42126 | 1.99599 |  |
| 20 | 2.5778 | 0.42424 | 1.00089 | 1.49161 | 2.02095 |  |
| 21 | 3.38507 | -0.27353 | 0.13472 | 0.72634 | 1.32594 |  |
| 22 | 2.83488 | -0.9331 | -0.14896 | 0.58895 | 1.25279 |  |
| 23 | 1.86755 | -2.9382 | -1.73373 | -0.62655 | 0.20129 |  |
| 24 | 2.56831 | -1.42253 | -0.88195 | -0.04684 | 0.64142 |  |
| 25 | 2.758 | -1.03257 | -0.36803 | 0.33618 | 1.00597 |  |
| 26 | 3.08212 | -0.7685 | 0.07858 | 0.84112 | 1.48685 |  |
| 27 | 3.00168 | -0.06693 | 0.7518 | 1.48367 | 2.18689 |  |
| 28 | 2.5144 | -0.86256 | -0.19785 | 0.52189 | 1.22565 |  |
| 29 | 3.37132 | -0.69643 | -0.15289 | 0.50411 | 1.16454 |  |
| 30 | 3.26859 | -0.85351 | -0.27479 | 0.39859 | 1.04119 |  |
| 31 | 3.73751 | -0.65599 | 0.10285 | 0.82904 | 1.4577 |  |
| 32.a | 3.39322 | -0.90041 | -0.27931 | 0.43485 | 1.11038 | male |
| 32.b | 3.03868 | -1.2588 | -0.62005 | 0.13615 | 0.78611 | female |
| 33 | 2.78047 | 0.05252 | 0.77401 | 1.40216 | 2.07392 |  |
| 34 | 2.60944 | -1.38582 | -0.54428 | 0.34305 | 1.02165 |  |

**Upper Extremity Fine Motor**

| Item | SLOPE | B1 | B2 | B3 | B4 | DIF |
| --- | --- | --- | --- | --- | --- | --- |
| 1 | 2.69839 | -3.00297 | -2.03314 | -1.19328 | -0.61392 |  |
| 2 | 2.07909 | -1.42781 | -0.79169 | -0.049 | 0.65299 |  |
| 3 | 2.21365 | -2.18301 | -1.57384 | -0.68832 | 0.04545 |  |
| 4 | 2.15493 | -1.17014 | -0.73944 | 0.03101 | 0.59952 |  |
| 5 | 2.83069 | -2.40643 | -2.03305 | -1.19678 | -0.50432 |  |
| 6 | 2.18294 | -1.58873 | -1.12415 | -0.36146 | 0.43503 |  |
| 7 | 2.45354 | -2.18765 | -1.76049 | -0.97799 | -0.36308 |  |
| 8 | 3.21552 | -2.09218 | -1.6786 | -0.96784 | -0.35111 |  |
| 9 | 3.14384 | -2.88461 | -2.06843 | -1.2396 | -0.56428 |  |
| 10 | 3.00161 | -2.29532 | -1.80792 | -1.05407 | -0.41944 |  |
| 11 | 2.54771 | -2.16396 | -1.32446 | -0.48185 | 0.22171 |  |
| 12 | 2.29622 | -2.67268 | -1.81314 | -0.9496 | -0.24614 |  |
| 13 | 2.78885 | -2.251 | -1.78347 | -0.99322 | -0.36303 |  |
| 14 | 3.53963 | -2.42193 | -1.64425 | -0.84366 | -0.21233 |  |
| 15 | 2.58498 | -1.85718 | -1.43893 | -0.73261 | -0.04082 |  |
| 16 | 2.9422 | -1.98268 | -1.72715 | -1.06136 | -0.31741 |  |
| 17 | 1.61652 | -2.37274 | -1.17566 | -0.05998 | 0.77565 |  |
| 18 | 2.17787 | -2.26651 | -1.653 | -0.82386 | -0.04333 |  |
| 19 | 2.10116 | -2.12273 | -1.65058 | -0.84678 | -0.12832 |  |
| 20 | 2.50785 | -2.43802 | -1.62465 | -0.82788 | -0.11469 |  |
| 21 | 3.53013 | -2.58328 | -1.81369 | -0.98891 | -0.35002 |  |
| 22 | 2.43416 | -1.3257 | -0.77658 | -0.03347 | 0.62329 |  |
| 23 | 1.76543 | -1.5118 | -0.68871 | 0.14829 | 0.91753 |  |
| 24 | 3.87464 | -2.20525 | -1.69476 | -0.94637 | -0.31936 |  |
| 25 | 3.09107 | -2.11934 | -1.87885 | -1.1966 | -0.54712 |  |
| 26 | 2.68848 | -2.52118 | -1.93365 | -1.02775 | -0.26809 |  |
| 27 | 3.03729 | -1.83151 | -1.42702 | -0.82515 | -0.25644 |  |
| 28 | 3.00097 | -1.93477 | -1.27446 | -0.5585 | 0.14326 |  |
| 29.a | 1.78484 | -1.91641 | -1.21665 | -0.27865 | 0.59254 | male |
| 29.b | 1.58167 | -1.90307 | -0.99246 | 0.03467 | 0.839 | female |
| 30 | 2.07069 | -2.50323 | -1.76225 | -0.82988 | -0.00504 |  |
| 31 | 2.36114 | -1.94777 | -1.31894 | -0.63895 | 0.03634 |  |
| 32.a | 2.6053 | -1.7017 | -1.16406 | -0.48366 | 0.24725 | male |
| 32.b | 2.03731 | -1.33538 | -0.78054 | -0.00861 | 0.68254 | female |
| 33 | 2.93551 | -2.72081 | -1.99145 | -1.2203 | -0.54272 |  |
| 34 | 3.16454 | -2.39522 | -1.75207 | -1.02041 | -0.3818 |  |
| 35 | 2.44649 | -2.94052 | -2.04048 | -1.14579 | -0.40858 |  |
| 36 | 3.14193 | -2.40369 | -1.7196 | -0.91755 | -0.25258 |  |
| 37 | 3.74431 | -2.26427 | -1.71115 | -1.02962 | -0.43129 |  |
| 38 | 2.81963 | -2.22481 | -1.42326 | -0.66462 | 0.02829 |  |
| 39.a | 2.53111 | -2.36985 | -1.59276 | -0.66698 | 0.10438 | male |
| 39.b | 2.0748 | -1.92704 | -0.97082 | -0.00372 | 0.81386 | female |
| 40 | 1.99048 | -2.84283 | -1.94219 | -0.90534 | -0.11753 |  |
| 41 | 3.62219 | -2.46485 | -1.96277 | -1.18914 | -0.50544 |  |
| 42 | 3.21136 | -2.73874 | -2.14831 | -1.42679 | -0.7327 |  |
| 43 | 3.21377 | -2.38061 | -1.67807 | -0.87804 | -0.20335 |  |
| 44 | 3.16069 | -2.21285 | -1.45482 | -0.70317 | -0.04068 |  |
| 45.a | 2.88185 | -2.13365 | -1.50994 | -0.83484 | -0.07254 | male |
| 45.b | 2.1394 | -1.82457 | -1.12557 | -0.35524 | 0.34974 | female |

**Community Mobility Driving**

| Item | SLOPE | B1 | B2 |
| --- | --- | --- | --- |
| 1 | 1.41586 | -3.64186 | -2.96763 |
| 2 | 2.94184 | -2.27532 | -1.36466 |
| 3 | 3.2332 | -2.70606 | -1.72574 |
| 4 | 3.96116 | -2.88246 | -2.01754 |
| 5 | 2.1034 | -2.38854 | -1.45034 |

**Community Mobility Public Transportation**

| Item | SLOPE | B1 | B2 | B3 | B4 |
| --- | --- | --- | --- | --- | --- |
| 1 | 1.26799 | -3.39656 | -2.20991 | -1.30148 | 1.06968 |
| 2 | 3.09302 | -2.09553 | -1.36414 | -0.60617 | 0.14678 |
| 3 | 2.14687 | -1.89949 | -0.9949 | -0.13357 | 0.6907 |
| 4 | 3.37969 | -2.49808 | -1.56445 | -0.80958 | -0.16306 |
| 5 | 2.40906 | -2.72233 | -1.75852 | -0.88794 | -0.22973 |
| 6 | 1.8949 | -3.09564 | -2.08561 | -1.15934 | -0.44957 |
