# Supplementary material for: Improving measures of work-related physical functioning
Source: Springer Nature journal article supplement (doi:10.1007/s11136-016-1477-1), 2016-12-22
Supplement: MOESM2 [file 11952994]

**Appendix B. The number of items at each analytic stage for each WD-FAB scales**

| **Claimant Calibration** | | | | |
| --- | --- | --- | --- | --- |
|  | **Basic Mobility** | **Upper Body Function** | **Upper Extremity Fine Motor** | **Community Mobility** |
| **Items Fielded** | 45 | 33 | 36 | 20 |
|  |  |  |  |  |
| **Factor analysis** |  |  |  |  |
| Items removed | 14 | 11 | 1 | 9 |
| Items retained | 31 | 22 | 35 | 11 |
|  |  |  |  |  |
| **IRT analysis for FAB 2.0 data** |  |  |  |  |
| Items removed | 1  (DIF between FAB 1.0 and FAB 2.0 samples) | 0 | 4  (misfit) | 0 |
| Items Retained | 30 | 22 | 31 | 11 |
|  |  |  |  |  |
| **Linking analysis (between FAB 1.0 and FAB 2.0)** |  |  |  | - |
| Anchor items | 16 | 9 | 14 |  |
| Items Removed | 1a  (Age DIF) | 1 | 3b  (Gender DIF) | - |
| Number of Anchor Items Retained | 15 | 8 | 11 | - |
|  |  |  |  |  |
| **Final FAB 2.0** |  |  |  |  |
| New items | 14 | 13 | 17 | - |
| Old items | 27 | 12 | 17 | - |
| **Total** | **56** | **34** | **45** | **11** |

aRemoved as an anchor item from linking analysis and retained in the item bank as "Old" item with separate calibrations by gender.
bRemoved as anchor items in linking analysis and retained in the item banks as "Old" items with no gender DIF, based on FAB 1.0 scale.

| **Working Age Adult Calibration** | | | | |
| --- | --- | --- | --- | --- |
| **Analytic Stage** | **Basic Mobility** | **Upper Body Function** | **Upper Extremity Fine Motor** | **Community Mobility** |
| **Items Fielded** | 45 | 33 | 36 | 20 |
|  |  |  |  |  |
| **Factor Analysis** |  |  |  |  |
| Items Removed | 14 | 0 | 0 | 5 |
| Items Retained | 31 | 33 | 36 | 15 |
|  |  |  |  |  |
| **IRT analysis** |  |  |  |  |
| Items Removed | 0 | 5  (misfit) | 1  (misfit) | 0 |
| Items Retained | 31 | 28 | 35 | 15 |
|  |  |  |  |  |
| **Linking analysis (between Claimant sample and working age sample)** |  |  |  |  |
| Number of anchor items | 28 | 16 | 24 | 11 |
| Items Removed | 2  (DIF between claimant sample and general working age sample) | 0 | 2  (DIF between claimant sample and general working age sample) | 0 |
| Items retained | 26 | 16 | 22 | 11 |
|  |  |  |  |  |
| **Final FAB 2.0 (Working Age Adult)** |  |  |  |  |
| New items | 14 | 18 | 21 | 15 |
| Old items | 17 | 10 | 14 | 0 |
| **Total** | **31** | **28** | **35** | **15** |
